# Supplementary material for: Uniparental disomy in a population of 32,067 clinical exome trios
Source: PubMed Central journal article supplement (PMC8187148; doi:10.1038/s41436-020-01092-8), 2021-01-25
Supplement: 41436_2020_1092_MOESM1_ESM.pdf [file 41436_2020_1092_MOESM1_ESM.pdf]

## Supplemental Data

**Supplemental Figure S1.** Schematic diagram of the algorithm for identification of high confidence stretches of Mendelian error, filtering by size and observed copy number, and ultimate identification of UPD and disomy type.

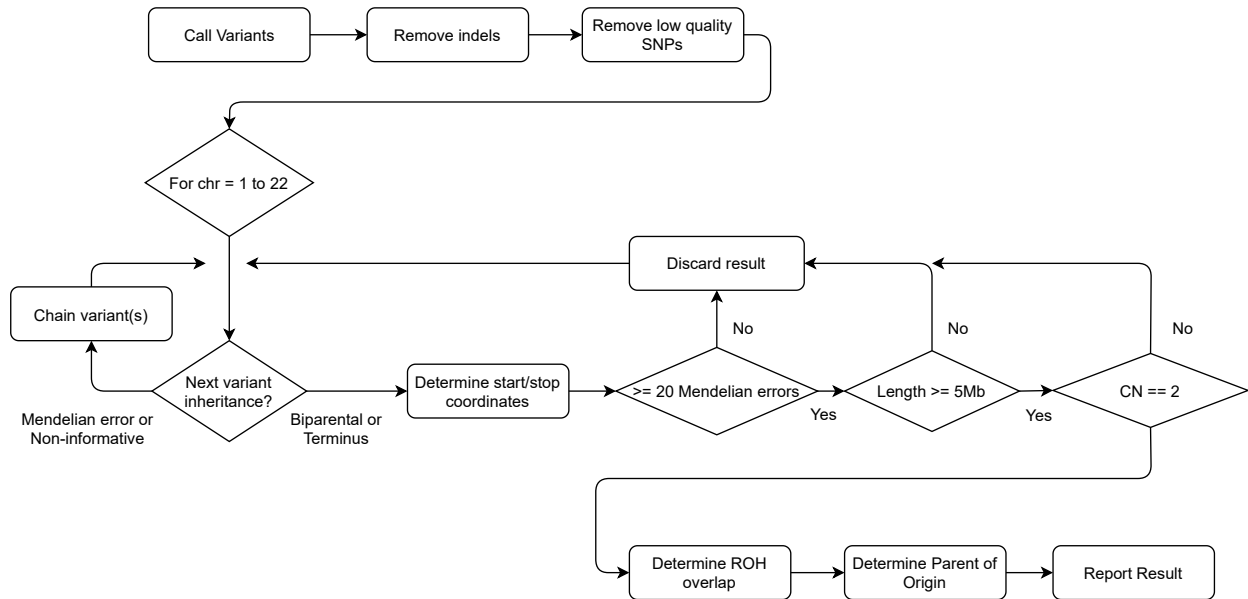

**Table S1 (Excel file).** Proband phenotypes within the UPD cohort overlapped a median of 16 HPO terms based on provided clinical records. 50 phenotypes were observed in > 5% of the probands.

**Table S2.** Trio genotype combinations supporting either uniparental or biparental inheritance. Combinations not appearing below would be non-informative to the parent of origin.

| <b>Class</b>           | <b>Child Genotype</b> | <b>Parental Genotype 1</b> | <b>Parental Genotype 2</b> |
|------------------------|-----------------------|----------------------------|----------------------------|
| <i>Mendelian error</i> | hom                   | hom                        | wt                         |
| <i>Mendelian error</i> | wt                    | wt                         | hom                        |
| <i>Biparental</i>      | het                   | hom                        | wt                         |

**Table S3.** SNVs meeting filtering criteria per chromosome. A median of 50,846 total variants per sample were analyzed.

| <b><i>Chromosome</i></b> | <b><i>Median High-Quality Variant Sites</i></b> |
|--------------------------|-------------------------------------------------|
| <i>chr1</i>              | 7150                                            |
| <i>chr2</i>              | 4293                                            |
| <i>chr3</i>              | 3502                                            |
| <i>chr4</i>              | 2420                                            |
| <i>chr5</i>              | 2627                                            |
| <i>chr6</i>              | 2672                                            |
| <i>chr7</i>              | 3477                                            |
| <i>chr8</i>              | 2226                                            |
| <i>chr9</i>              | 2903                                            |
| <i>chr10</i>             | 3151                                            |
| <i>chr11</i>             | 4439                                            |
| <i>chr12</i>             | 3347                                            |
| <i>chr13</i>             | 1103                                            |
| <i>chr14</i>             | 1935                                            |
| <i>chr15</i>             | 2411                                            |
| <i>chr16</i>             | 3454                                            |
| <i>chr17</i>             | 4562                                            |
| <i>chr18</i>             | 1014                                            |
| <i>chr19</i>             | 4560                                            |
| <i>chr20</i>             | 1711                                            |
| <i>chr21</i>             | 1107                                            |
| <i>chr22</i>             | 1839                                            |

**Table S4 (Excel file).** Out of all whole chromosome UPD events which were categorized as complete heterodisomy or complete isodisomy, fewer Mendelian errors were detected on average in chromosomes with heterodisomy and made up a smaller proportion of high-quality variant sites.

**Table S5.** Homozygous variants identified on UPD chromosomes as causatively associated with a patient's provided phenotype.

| ClinVar Accession | Location (hg19)          | Gene           | HGVS                               |
|-------------------|--------------------------|----------------|------------------------------------|
| RCV000356077      | chr1:40555163            | <i>PPT1</i>    | NM_000310.3:c.455delG              |
| VCV000372895      | chr1: 43902925-43902927  | <i>SZT2</i>    | NM_015284.4:c.5949_5951del         |
| VCV000008953      | chr1:53668099            | <i>CPT2</i>    | NM_000098.3:c.338C>T               |
| VCV000014188      | chr1:161277049           | <i>MPZ</i>     | NM_000530.8:c.233C>T               |
| VCV000234471      | chr1:197070257           | <i>ASPM</i>    | NM_018136.5:c.8124T>G              |
| VCV000372820      | chr1:240492679           | <i>FMN2</i>    | NM_020066.5:c.4348C>T              |
| VCV000432173      | chr2:210836937           | <i>UNC80</i>   | NM_032504.1:c.8071G>T              |
| VCV000977651      | chr2:217300074           | <i>SMARCA1</i> | NM_014140.4:c.1499G>A              |
| VCV000524013      | chr3:123166964-123166977 | <i>ADCY5</i>   | NM_183357.2:c.402_415CGGCGGCGCGGCT |
| VCV000546181      | chr3:186980510           | <i>MASP1</i>   | NM_139125.3:c.238-2A>T             |
| VCV000235732      | chr8:97172848            | <i>GDF6</i>    | NM_001001557.4:c.73C>T             |
| In progress       | chr16:28490044-28496049  | <i>CLN3</i>    | NC_000016.9:g.28490044_28496049[4] |
| VCV000595193      | chr18:55322503           | <i>ATP8B1</i>  | NM_005603.6:c.2854C>T              |
| VCV000431812      | chr22:43026971           | <i>CYB5R3</i>  | NM_000398.7:c.250C>T               |
| VCV000005681      | chr22:50962423           | <i>NCAPH2</i>  | NM_005138.2:c.418G>A               |
| VCV000068165      | chr22:51064623           | <i>ARSA</i>    | NM_000487.6:c.938G>A               |

**Table S6.** Chromosomal location of segmental Mendelian error events which were determined to represent either deletions or UPD.

|                     | <i>Deletion</i> | <i>Segmental UPD</i> |
|---------------------|-----------------|----------------------|
| <i>Terminal</i>     | 16              | 13                   |
| <i>Interstitial</i> | 19              | 0                    |
| <i>Total</i>        | 35              | 13                   |
